# Supplementary material
Source: PubMed Central journal article supplement (PMC2880881)
Supplement: NIHMS196609-supplement-Supplement.pdf [file NIHMS196609-supplement-Supplement.pdf]

## Supplementary Appendix

This appendix has been provided by the authors to give readers additional information about their work.

Supplement to: Silveira MJ, Kim SYH, Langa KM. Advance directives and outcomes of surrogate decision making before death. *N Engl J Med* 2010;362:1211-8.

Online Appendix: Survey questions used to collect data about variables of main interest.<sup>1</sup>

| <b>Variable</b>                             | <b>Question to Proxy</b>                                                                                                                             |
|---------------------------------------------|------------------------------------------------------------------------------------------------------------------------------------------------------|
| Living will                                 | <i>Did [FIRST NAME] provide written instructions about the treatment or care [she/he] wanted to receive during the final days of [her/his] life?</i> |
| Preference for all care possible            | <i>Did these instructions express a desire to receive all care possible under any circumstances in order to prolong life?</i>                        |
| Preference for limited treatment            | <i>Did these instructions express a desire to limit care in certain situations?</i>                                                                  |
| Preference for comfort care                 | <i>Did these instructions express a desire to) keep [her/him] comfortable and pain free but to forego extensive measures to prolong life?</i>        |
| Required decision-making at the end of life | <i>Did any decisions have to be made about the care and treatment of [FIRST NAME] during the final days of [her/his] life?</i>                       |
| Decision-making capacity                    | <i>Was [FIRST NAME] able to participate in decisions about [her/his] medical care during the final days of [her/his] life?</i>                       |

---

<sup>1</sup> For all questions shown, respondents were given the same choices: Yes, No, Don't know, Refused, or Inapplicable.

|                                          |                                                                                                                                                                                                                                                               |
|------------------------------------------|---------------------------------------------------------------------------------------------------------------------------------------------------------------------------------------------------------------------------------------------------------------|
| Actual decision-maker                    | <i>Who was the main decision-maker?</i>                                                                                                                                                                                                                       |
| Outcome of all care possible             | <i>Did those last decisions involve a desire to give all care possible unconditionally in order to prolong life?</i>                                                                                                                                          |
| Outcome of limited treatment             | <i>Did those last decisions involve limiting care in certain situations?</i>                                                                                                                                                                                  |
| Outcome of comfort care                  | <i>Did those last decisions rest largely on keeping [FIRST NAME] comfortable and pain free without taking extensive measures to prolong life?</i>                                                                                                             |
| Durable Power of Attorney for Healthcare | <i>Did [FIRST NAME] make any legal arrangements for a specific person or persons to make decisions about his care or medical treatment if he could not make those decisions himself. This is sometimes called a Durable Power of Attorney for Healthcare.</i> |
| Appointed decision-maker                 | <i>Who had that authority?</i>                                                                                                                                                                                                                                |
| Applicability of living will             | <i>Were these instructions applicable to the actual situation?</i>                                                                                                                                                                                            |
| Problems applying living will            | <i>Did any problems come up in trying to follow these written instructions?</i>                                                                                                                                                                               |
